# Supplementary material for: Adaptation of Oxidative Phosphorylation Machinery Compensates for Hepatic Lipotoxicity in Early Stages of MAFLD
Source: MDPI journal article supplement (doi:10.3390/ijms23126873), 2022-06-20
Supplement: s1 [file s1]

## **SUPPLEMENTARY DATA**

### **Adaption of oxidative phosphorylation machinery compensates hepatic lipotoxicity in early stages of MAFLD**

Pia Fahlbusch<sup>1,2</sup>, Aleksandra Nikolic<sup>1,2</sup>, Sonja Hartwig<sup>1,2</sup>, Sylvia Jacob<sup>1</sup>, Ulrike Kettel<sup>1</sup>, Cornelia Köllmer<sup>1</sup>, Hadi Al-Hasani<sup>1,2,3</sup>, Stefan Lehr<sup>1,2</sup>, Dirk Müller-Wieland<sup>4</sup>, Birgit Knebel<sup>1,2,#,\*</sup>, Jörg Kotzka<sup>1,2,#</sup>.

<sup>1</sup>Institute of Clinical Biochemistry and Pathobiochemistry, German Diabetes Center at the Heinrich-Heine-University Duesseldorf, Leibniz Center for Diabetes Research; 40225 Duesseldorf, Germany;

<sup>2</sup>German Center for Diabetes Research (DZD), Partner Duesseldorf, 40225 Duesseldorf, Germany

<sup>3</sup> Medical Faculty Heinrich-Heine-University Düsseldorf, 40225 Düsseldorf Germany, 40225 Düsseldorf

<sup>4</sup> Clinical Research Centre, Department of Internal Medicine I, University Hospital Aachen, 52074, Aachen

#both authors contributed equally

#### **\*Correspondence:**

Birgit Knebel, PhD  
Institute of Clinical Biochemistry and Pathobiochemistry  
German Diabetes Center,  
Leibniz Center for Diabetes Research  
at Heinrich-Heine-University Duesseldorf  
Auf'm Hennekamp 65  
40225 Duesseldorf, Germany  
E-mail: birgit.knebel@ddz.de  
Phone: +49-211-3382 536

## Supplement

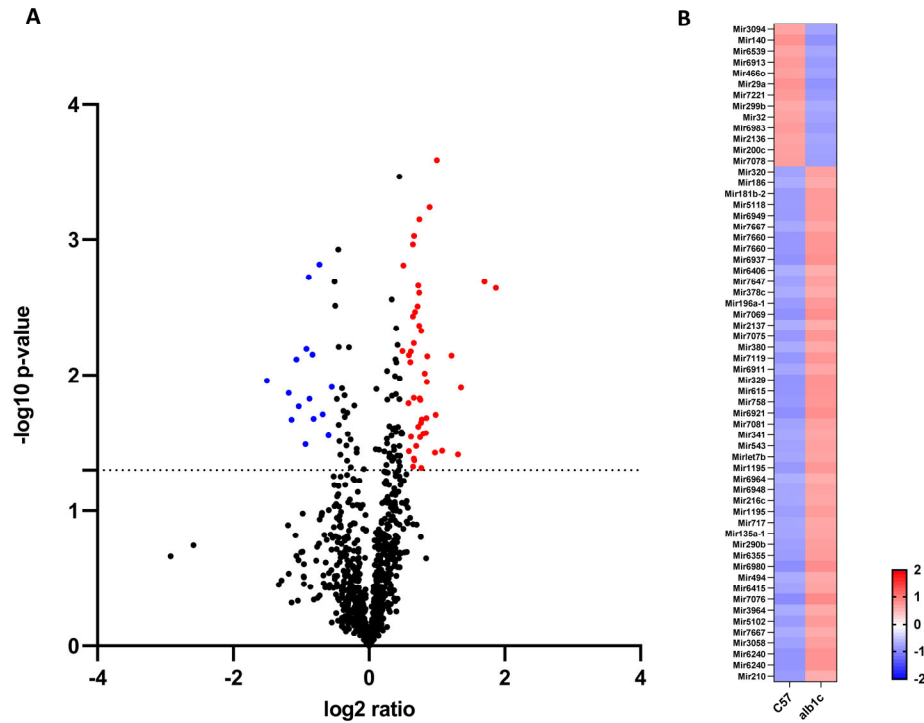

**Supplementary Figure S1. Impact of constitutive overexpression of SREBP-1c to hepatic miRNA.** (A) The log<sub>2</sub> fold changes of miRNA abundance in alb-SREBP-1c vs C57Bl6 mice (n = 8 animals per condition). 1067 differentially abundant miRNA species were detected. Upregulated (red; n = 55) or downregulated proteins (blue; n = 22) were determined by Student's t-test (p > 0.05) with a 1.5 fold regulation. (B) Differentially regulated miRNAs. Red identifies upregulation and blue identifies downregulation of miRNAs.

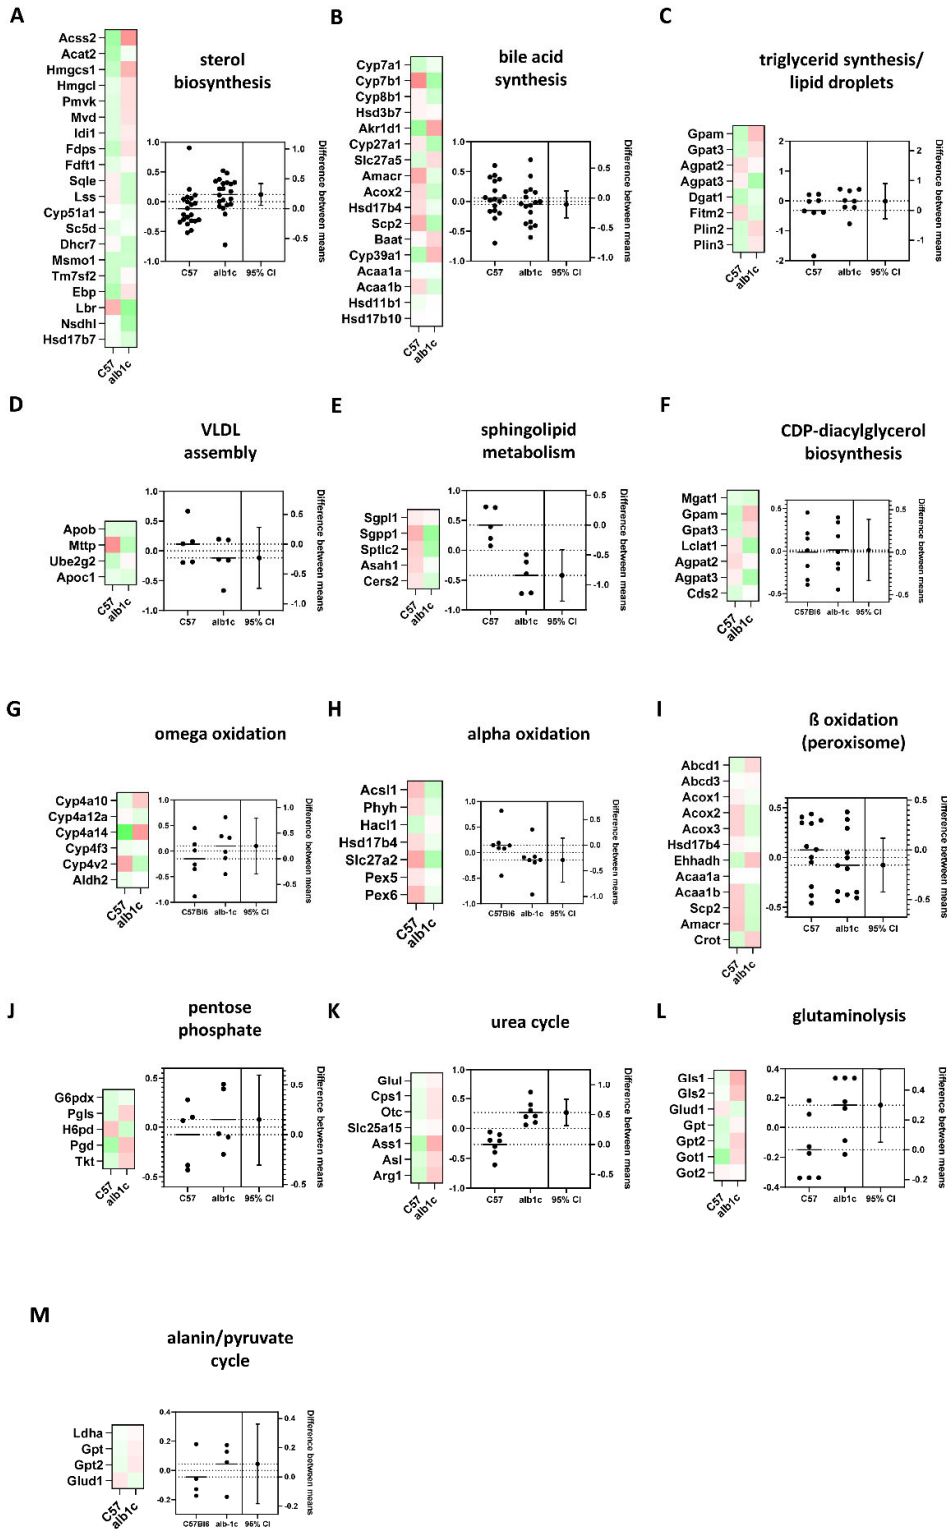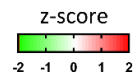

**Supplementary Figure S2: Changes in biosynthesis processes in early stage MAFLD.** Heat maps resulting from z-score analyses and estimation plots for each pathway are included: **(A)** Sterol biosynthesis, **(B)** bile acid synthesis, **(C)** triglyceride synthesis/ lipid droplets, **(D)** VLDL assembly, **(E)** sphingolipid metabolism, **(F)** CDP-diacylglycerol biosynthesis, **(G)** omega oxidation, **(H)** alpha oxidation, **(I)**  $\beta$  oxidation (peroxisome), **(J)** pentose phosphate, **(K)** urea cycle, **(L)** glutaminolysis and **(M)** alanine/pyruvate cycle. Estimation plots show differences between means of alb-SREBP-1c vs C57Bl6 ( $\pm 95\%$  CI) (mean z-score: left axis, effect size: right axis).

**Supplementary Table S1: Body composition and metabolic-related parameters of C57Bl6 and alb-SREBP-1c mice.** Data presented as means with 95% CI of mean. Statistical analyses were done by Wilcoxon and Mann-Whitney test.

|                                     | C57Bl6               | alb-SREBP-1c         | p-value |
|-------------------------------------|----------------------|----------------------|---------|
| N (male)                            | 10                   | 10                   |         |
| Body weight (g)                     | 32.10 (30.28; 33.92) | 35.95 (34.80; 37.08) | 0.0015  |
| Liver weight (g)                    | 1.57 (1.43; 1.71)    | 1.93 (1.81; 2.05)    | 0.0005  |
| Liver weight/body weight (%)        | 4.92 (4.46; 5.37)    | 5.38 (4.95; 5.82)    | 0.1715  |
| Total fatty acid (TFA) (mg/g liver) | 25.35 (22.51; 28.19) | 65.80 (55.01; 76.59) | 0.0001  |
| TFA/liver weight (%)                | 1.63 (1.42; 1.83)    | 3.29 (2.95; 3.83)    | 0.0001  |
| Visceral fat (g)                    | 0.89 (0.77; 1.02)    | 2.37 (2.03; 2.71)    | 0.0001  |
| Fasted blood glucose (mg/dl)        | 126.8 (117.2; 136.4) | 150.2 (137.8; 162.6) | 0.0028  |
| Serum triglycerides (mg/dl)         | 127.5 (106.0; 149.0) | 237.4 (193.1; 281.7) | 0.0001  |
| Serum NEFA (mg/dl)                  | 1.07 (0.89; 1.24)    | 2.38 (2.09; 2.66)    | 0.0001  |
