# Supplementary material for: Adaptation of Oxidative Phosphorylation Machinery Compensates for Hepatic Lipotoxicity in Early Stages of MAFLD
Source: MDPI journal article supplement (doi:10.3390/ijms23126873), 2022-06-20
Supplement: s1 [file s1]

Data were analysed using the Core expression routine  
<https://www.glagenbioinformatics.com/products/ingenuity-pathway-analysis>  
Krämer A, Green J, Pollard J, Jr, Tugendreich S. Causal analysis approaches in Ingenuity Pathway Analysis. *Bioinforma*. 2014;**30**:523–530.

**IPA Settings for analyses of hepatocyte transcripts (setA) and miRNA (set B)**

|                                    |                                          |
|------------------------------------|------------------------------------------|
| Analysis Settings                  |                                          |
| Cutoff before duplicate resolution | true                                     |
| Resolve duplicate on               | Expression logfoldchange                 |
| Color using                        | Expression logfoldchange                 |
| Cutoff for Expression foldchange   | down regulated -1.3 and up regulated 1.3 |
| Cutoff for Expression pvalue       | 0.05                                     |
| Reference set                      | Ingenuity Knowledge Base (Genes Only)    |
| Relationship to include            | Direct and Indirect                      |
| Includes Endogenous Chemicals      | Yes                                      |

**Filter Summary**

Consider only molecules and/or relationships where  
(confidence = High (predicted) OR Experimentally Observed) AND

(mol. types = biologic drug OR canonical pathway OR chemical - endogenous mammalian OR chemical - endogenous non-mammalian OR chemical - kinase inhibitor OR chemical - other OR chemical - protease inhibitor OR chemical drug OR chemical reagent OR chemical toxicant OR complex OR cytokine OR disease OR enzyme OR function OR G-protein coupled receptor OR group OR growth factor OR ion channel OR kinase OR ligand-dependent nuclear receptor OR mature microRNA OR microRNA OR other OR peptidase OR phosphatase OR transcription regulator OR translation regulator OR transmembrane receptor OR transporter)

Datasets show analyses ready molecules for IPA for analyses (Spring Release 2021)

Analyses set A: hepatocyte derived transcripts

| ID                   | Symbol        | Expr Fold Ch | Expr p-value |
|----------------------|---------------|--------------|--------------|
| TC0700001119.mm.1    | ABHD2         | 3,24         | 9,90E-03     |
| TC1800000794.mm.1    | ACAA2         | -2,78        | 3,84E-03     |
| TC1100001276.mm.1    | ACACA         | -2,08        | 1,55E-02     |
| TC1700001458.mm.1    | ACAT2         | 1,88         | 2,35E-02     |
| TC0300001413.mm.1    | Adh6-ps1      | -1,53        | 2,43E-02     |
| TC1100001289.mm.1    | Akirin1-ps    | 1,34         | 1,54E-02     |
| TC1200000057.mm.1    | APOB          | 1,79         | 3,49E-02     |
| TC1400000862.mm.1    | ARL11         | 1,39         | 8,20E-03     |
| TC1300001298.mm.1    | ARL15         | -1,33        | 2,62E-02     |
| TC0500003018.mm.1    | ASPHD2        | -1,45        | 3,05E-02     |
| TC1500001568.mm.1    | ATAD2         | -1,34        | 2,10E-02     |
| TC1500001068.mm.1    | ATG101        | -1,53        | 4,99E-03     |
| TC1000001543.mm.1    | AVIL          | -1,44        | 2,36E-02     |
| TC1400000853.mm.1    | C1QTNF9B      | -1,30        | 2,63E-02     |
| TC1500000014.mm.1    | C6            | -1,83        | 3,34E-02     |
| TC1100002158.mm.1    | CAMK2B        | 1,44         | 1,81E-03     |
| TC0700002502.mm.1    | CBLC          | 1,36         | 1,04E-02     |
| TSUnmapped00000018.n | CCDC169       | -1,44        | 1,78E-02     |
| TC0700002912.mm.1    | Cd9-ps        | 1,45         | 4,60E-03     |
| TC0X00002320.mm.1    | Cdr1          | -1,34        | 2,93E-02     |
| TC0700002635.mm.1    | CEACAM1       | 1,62         | 2,64E-02     |
| TC1400002101.mm.1    | CIDEB         | 1,64         | 1,78E-02     |
| TC0800000984.mm.1    | Cks1brt       | -1,37        | 4,25E-02     |
| TC1600001419.mm.1    | CLDN1         | 2,54         | 3,52E-02     |
| TC0X00003226.mm.1    | Cldn34b2 (inc | 1,31         | 2,34E-02     |
| TC0100000572.mm.1    | CP51          | 3,56         | 1,77E-02     |
| TC1900000008.mm.1    | CPT1A         | 1,57         | 1,88E-02     |
| TC1500000852.mm.1    | CRELD2        | -1,58        | 3,48E-02     |
| TC0300000902.mm.1    | CTSK          | -1,32        | 2,38E-02     |
| TC0100003029.mm.1    | CXCR4         | 1,33         | 1,92E-02     |
| TC1500001957.mm.1    | Cyp2d26       | 2,10         | 4,15E-03     |
| TC0400002151.mm.1    | CYP7A1        | -1,59        | 7,42E-03     |
| TC0300001689.mm.1    | CYP7B1        | -1,80        | 3,23E-02     |
| TC1400000891.mm.1    | Defb43        | 1,43         | 8,50E-03     |
| TC1400002213.mm.1    | Defb48        | 1,38         | 1,91E-02     |
| TC0900002720.mm.1    | DPPA5         | -1,36        | 1,23E-02     |
| TC1700001067.mm.1    | Dreh          | -1,34        | 4,15E-02     |
| TC1000002199.mm.1    | Dux           | -1,63        | 8,80E-03     |
| TC0900002038.mm.1    | EI24          | 1,47         | 2,20E-02     |
| TC1300000072.mm.1    | ERO1B         | -1,41        | 2,51E-02     |
| TC0700000388.mm.1    | ETHE1         | 1,60         | 4,29E-02     |
| TC1400001724.mm.1    | Fam25c        | -1,36        | 3,85E-02     |
| TC0600000227.mm.1    | FAM71F2       | -1,65        | 4,83E-02     |
| TC0300000967.mm.1    | FMO5          | 1,78         | 1,79E-02     |
| TC1100001654.mm.1    | G6PC1         | -2,36        | 2,29E-02     |
| TC1100001622.mm.1    | GAST          | 1,46         | 3,25E-02     |
| TC1100003466.mm.1    | GDPD1         | -1,34        | 1,79E-02     |
| TC0300000852.mm.1    | Gm12854/S1    | 2,33         | 1,99E-02     |
| TC1400000963.mm.1    | GNRH1         | -1,33        | 3,37E-02     |
| TC0500000987.mm.1    | GPAT3         | -1,41        | 1,22E-02     |
| TC0900002719.mm.1    | GSTA5         | 1,38         | 4,78E-02     |
| TC0600003374.mm.1    | GYS2          | -1,87        | 5,48E-03     |
| TC0X00000120.mm.1    | H2ap          | 1,48         | 9,65E-03     |
| TC0300000930.mm.1    | H2BC11        | -1,37        | 2,42E-03     |
| TC1300000191.mm.1    | H2BC12        | 1,45         | 2,97E-02     |
| TC0X00000987.mm.1    | H3f3a-ps1     | -1,50        | 1,59E-02     |
| TC1600002063.mm.1    | H3f3a-ps2     | -1,48        | 1,52E-02     |
| TC1000001133.mm.1    | HAL           | 1,78         | 4,30E-02     |
| TC1900000560.mm.1    | HELLS         | -1,39        | 3,39E-02     |
| TC1600001496.mm.1    | Hmgb1-ps6     | -1,35        | 4,13E-02     |
| TC0500000230.mm.1    | Hspe1-ps3     | 1,32         | 4,11E-02     |
| TC1200001663.mm.1    | IFRD1         | -1,66        | 3,48E-02     |
| TC1200002572.mm.1    | Ighv5-17      | 1,44         | 1,15E-02     |

Analyses set B: hepatocyte derived miRNAs

| ID                 | Symbol   | Expr Fold Ch | Expr p-value |
|--------------------|----------|--------------|--------------|
| TC0800001406.mm.1  | Mir7078  | -2,84        | 1,10E-02     |
| TC06000003113.mm.1 | mir-8    | -2,27        | 1,35E-02     |
| TC0900001314.mm.1  | Mir2136  | -2,20        | 2,13E-02     |
| TC1800000626.mm.1  | Mir6983  | -2,10        | 7,67E-03     |
| TC0400002710.mm.1  | mir-32   | -2,05        | 1,70E-02     |
| TC1200002373.mm.1  | mir-299  | -1,92        | 3,23E-02     |
| TC0200001439.mm.1  | Mir7221  | -1,90        | 6,39E-03     |
| TC0600002009.mm.1  | mir-29   | -1,85        | 1,89E-03     |
| TC1000000897.mm.1  | Mir6913  | -1,78        | 7,04E-03     |
| TC1400002294.mm.1  | Mir6539  | -1,76        | 2,10E-02     |
| TC0800001278.mm.1  | mir-140  | -1,66        | 1,52E-03     |
| TC0400000355.mm.1  | Mir3094  | -1,61        | 1,94E-02     |
| TC0X00002216.mm.1  | Mir6384  | -1,51        | 2,78E-02     |
| TC1000001865.mm.1  | Mir7663  | -1,46        | 1,22E-02     |
| TC1200002444.mm.1  | Mir6941  | -1,42        | 2,04E-03     |
| TC0700004590.mm.1  | Mir7064  | -1,39        | 1,50E-02     |
| TC1500000783.mm.1  | Mir6392  | -1,37        | 1,18E-03     |
| TC0X00002779.mm.1  | mir-95   | -1,36        | 2,32E-02     |
| TC0700001433.mm.1  | mir-139  | -1,36        | 6,21E-03     |
| TC1100001544.mm.1  | Mir6927  | -1,35        | 3,07E-02     |
| TC1000000575.mm.1  | Mir5108  | -1,34        | 3,86E-02     |
| TC0200000111.mm.1  | mir-467  | -1,32        | 1,25E-02     |
| TC1300002100.mm.1  | mir-7    | -1,30        | 1,83E-02     |
| TC0100001558.mm.1  | Mir6348  | 1,30         | 1,01E-02     |
| TC1000000880.mm.1  | mir-5615 | 1,31         | 7,64E-03     |
| TC1700000674.mm.1  | Mir6973a | 1,32         | 1,38E-02     |
| TC1800000565.mm.1  | Mir1258  | 1,32         | 2,62E-02     |
| TC0200004528.mm.1  | Mir210   | 1,32         | 3,04E-02     |
| TC0200002786.mm.1  | Mir3091  | 1,32         | 8,05E-03     |
| TC0800002464.mm.1  | Mir7068  | 1,34         | 5,97E-03     |
| TC0900000076.mm.1  | Mir6237  | 1,34         | 2,40E-02     |
| TC1800001079.mm.1  | mir-187  | 1,36         | 3,42E-04     |
| TC0X00002370.mm.1  | mir-506  | 1,36         | 3,34E-02     |
| TC0200004139.mm.1  | Mir7000  | 1,36         | 1,50E-02     |
| TC1600001505.mm.1  | Mir1946a | 1,36         | 1,06E-02     |
| TC0800000951.mm.1  | mir-23   | 1,37         | 3,93E-02     |
| TC0700002618.mm.1  | Mir7047  | 1,39         | 2,71E-02     |
| TC1800000106.mm.1  | Mir1948  | 1,39         | 2,64E-02     |
| TC0100003622.mm.1  | mir-350  | 1,40         | 2,70E-02     |
| TC1100001187.mm.1  | mir-193  | 1,41         | 6,61E-03     |
| TC1500000168.mm.1  | Mir7212  | 1,42         | 1,55E-03     |
| TC1400000997.mm.1  | mir-320  | 1,50         | 1,61E-02     |
| TC0300001577.mm.1  | mir-186  | 1,50         | 3,64E-02     |
| TC0200000712.mm.1  | mir-181  | 1,50         | 7,11E-03     |
| TSUnmapped00000011 | Mir5118  | 1,52         | 8,01E-03     |
| TC1400002114.mm.1  | Mir6949  | 1,53         | 6,66E-03     |
| TSUnmapped00000010 | Mir7660  | 1,56         | 3,68E-03     |
| TC1200000237.mm.1  | Mir6937  | 1,57         | 1,08E-03     |
| TC1100000870.mm.1  | Mir6406  | 1,57         | 4,72E-02     |
| TC0500003235.mm.1  | Mir7647  | 1,58         | 1,47E-02     |
| TC1100001491.mm.1  | mir-196  | 1,58         | 5,78E-03     |
| TC0800000967.mm.1  | Mir7069  | 1,58         | 9,42E-04     |
| TC0X00000671.mm.1  | Mir2137  | 1,59         | 4,25E-02     |
| TC0800002873.mm.1  | Mir7075  | 1,60         | 3,41E-03     |
| TC0400001466.mm.1  | Mir7119  | 1,64         | 3,11E-03     |
| TC1000000849.mm.1  | Mir6911  | 1,65         | 2,40E-02     |
| TC1500001122.mm.1  | mir-615  | 1,67         | 2,46E-03     |
| TC1200001172.mm.1  | mir-379  | 1,67         | 4,31E-03     |
| TC1100002870.mm.1  | Mir6921  | 1,67         | 7,02E-04     |
| TC0900001852.mm.1  | Mir7081  | 1,67         | 1,49E-02     |
| TC1200001143.mm.1  | mir-341  | 1,69         | 2,87E-02     |
| TC1200001178.mm.1  | mir-329  | 1,69         | 1,52E-02     |
| TC1500000819.mm.1  | let-7    | 1,70         | 2,24E-02     |

|                      |              |       |          |
|----------------------|--------------|-------|----------|
| TC0600003579.mm.1    | Igkv12-41    | -1,52 | 3,32E-02 |
| TC0600003581.mm.1    | Igkv5-39     | 1,37  | 2,56E-02 |
| TC0600003587.mm.1    | Igkv8-28     | 1,55  | 1,98E-02 |
| TC0600001252.mm.1    | IL17RC       | 1,31  | 5,00E-02 |
| TC0100002969.mm.1    | INSIG2       | 2,04  | 3,28E-02 |
| TC0800001694.mm.1    | IRS2         | 1,72  | 1,08E-02 |
| TC0100002762.mm.1    | KCNJ13       | 1,31  | 2,30E-02 |
| TC1500001410.mm.1    | KLF10        | -1,34 | 4,49E-02 |
| TC0600000822.mm.1    | KRCC1        | 1,30  | 3,36E-02 |
| TC1600002019.mm.1    | KRTAP19-3    | -1,53 | 4,73E-03 |
| TC0100000717.mm.1    | Krtap28-13   | -1,80 | 3,23E-02 |
| TC0700004559.mm.1    | Krtap5-5     | -1,34 | 3,63E-02 |
| TC1600002033.mm.1    | Krtap6-2     | -1,94 | 4,57E-02 |
| TC0200003265.mm.1    | KYAT1        | 1,63  | 3,92E-02 |
| TC0300001448.mm.1    | KYAT3        | -1,73 | 3,15E-02 |
| TC0800000123.mm.1    | LAMP1        | 2,17  | 2,26E-02 |
| TC0X00002085.mm.1    | LAMP2        | 2,27  | 1,45E-02 |
| TC1500000819.mm.1    | let-7        | 1,70  | 2,24E-02 |
| TC1100003314.mm.1    | LGALS9B      | 2,37  | 4,32E-02 |
| TC1900001419.mm.1    | LIPA         | 2,03  | 1,72E-02 |
| TC1200001662.mm.1    | LSMEM1       | -1,85 | 5,98E-03 |
| TC0X00003231.mm.1    | Magea3 (incl | -1,37 | 1,34E-02 |
| TC1300000021.mm.1    | Marcksl1-ps4 | -1,39 | 1,69E-02 |
| TC0100003026.mm.1    | MCM6         | -1,60 | 4,40E-02 |
| TC1500000380.mm.1    | MED30        | -1,32 | 3,71E-02 |
| TC0900001334.mm.1    | mir-135      | 1,79  | 2,07E-02 |
| TC0700001433.mm.1    | mir-139      | -1,36 | 6,21E-03 |
| TC0800001278.mm.1    | mir-140      | -1,66 | 1,52E-03 |
| TC1200001174.mm.1    | mir-154      | 1,96  | 3,72E-02 |
| TC0200000712.mm.1    | mir-181      | 1,50  | 7,11E-03 |
| TC0300001577.mm.1    | mir-186      | 1,50  | 3,64E-02 |
| TC1800001079.mm.1    | mir-187      | 1,36  | 3,42E-04 |
| TC1100001187.mm.1    | mir-193      | 1,41  | 6,61E-03 |
| TC1100001491.mm.1    | mir-196      | 1,58  | 5,78E-03 |
| TC0800000951.mm.1    | mir-23       | 1,37  | 3,93E-02 |
| TC0600002009.mm.1    | mir-29       | -1,85 | 1,89E-03 |
| TC1200002373.mm.1    | mir-299      | -1,92 | 3,23E-02 |
| TC0400002710.mm.1    | mir-32       | -2,05 | 1,70E-02 |
| TC1400000997.mm.1    | mir-320      | 1,50  | 1,61E-02 |
| TC1200001178.mm.1    | mir-329      | 1,69  | 1,52E-02 |
| TC1200001143.mm.1    | mir-341      | 1,69  | 2,87E-02 |
| TC0100003622.mm.1    | mir-350      | 1,40  | 2,70E-02 |
| TC1200001172.mm.1    | mir-379      | 1,67  | 4,31E-03 |
| TC0200000111.mm.1    | mir-467      | -1,32 | 1,25E-02 |
| TC0X00002370.mm.1    | mir-506      | 1,36  | 3,34E-02 |
| TC1000000880.mm.1    | mir-5615     | 1,31  | 7,64E-03 |
| TC1500001122.mm.1    | mir-615      | 1,67  | 2,46E-03 |
| TC1300002100.mm.1    | mir-7        | -1,30 | 1,83E-02 |
| TC0600003113.mm.1    | mir-8        | -2,27 | 1,35E-02 |
| TC0X00002779.mm.1    | mir-95       | -1,36 | 2,32E-02 |
| TC1600001462.mm.1    | Mir1195      | 1,77  | 9,71E-03 |
| TC1800000565.mm.1    | Mir1258      | 1,32  | 2,62E-02 |
| TC1600001505.mm.1    | Mir1946a     | 1,36  | 1,06E-02 |
| TC1800000106.mm.1    | Mir1948      | 1,39  | 2,64E-02 |
| TC0900001314.mm.1    | Mir2136      | -2,20 | 2,13E-02 |
| TC0X00000671.mm.1    | Mir2137      | 1,59  | 4,25E-02 |
| TC1100002410.mm.1    | Mir216c      | 1,74  | 2,70E-02 |
| TC0700002122.mm.1    | Mir290b      | 1,80  | 1,12E-02 |
| TC1000002730.mm.1    | Mir3058      | 2,56  | 1,23E-02 |
| TC0200002786.mm.1    | Mir3091      | 1,32  | 8,05E-03 |
| TC0400000355.mm.1    | Mir3094      | -1,61 | 1,94E-02 |
| TC1400001229.mm.1    | Mir3964      | 2,11  | 3,61E-02 |
| TC1000000575.mm.1    | Mir5108      | -1,34 | 3,86E-02 |
| TSUnmapped00000118.n | Mir5118      | 1,52  | 8,01E-03 |
| TC0900000076.mm.1    | Mir6237      | 1,34  | 2,40E-02 |
| TSUnmapped00000115.n | Mir6240      | 3,65  | 2,26E-03 |
| TC0100001558.mm.1    | Mir6348      | 1,30  | 1,01E-02 |

|                   |         |      |          |
|-------------------|---------|------|----------|
| TC1600002159.mm.1 | Mir6964 | 1,71 | 4,84E-02 |
| TC1400002064.mm.1 | Mir6948 | 1,71 | 2,12E-02 |
| TC1100002410.mm.1 | Mir216c | 1,74 | 2,70E-02 |
| TC1600001462.mm.1 | Mir1195 | 1,77 | 9,71E-03 |
| TC0X00002218.mm.1 | Mir717  | 1,79 | 2,68E-02 |
| TC0900001334.mm.1 | mir-135 | 1,79 | 2,07E-02 |
| TC0700002122.mm.1 | Mir290b | 1,80 | 1,12E-02 |
| TC1800000604.mm.1 | Mir6355 | 1,81 | 7,24E-03 |
| TC1800001223.mm.1 | Mir6980 | 1,85 | 5,73E-04 |
| TC1200001174.mm.1 | mir-154 | 1,96 | 3,72E-02 |
| TC0500000874.mm.1 | Mir6415 | 1,97 | 1,96E-02 |
| TC0800002952.mm.1 | Mir7076 | 2,00 | 2,58E-04 |
| TC1400001229.mm.1 | Mir3964 | 2,11 | 3,61E-02 |
| TC0900001862.mm.1 | Mir7667 | 2,48 | 3,84E-02 |
| TC1000002730.mm.1 | Mir3058 | 2,56 | 1,23E-02 |
| TSUnmapped0000011 | Mir6240 | 3,65 | 2,26E-03 |

|                      |                |       |          |
|----------------------|----------------|-------|----------|
| TC1800000604.mm.1    | Mir6355        | 1,81  | 7,24E-03 |
| TC0X00002216.mm.1    | Mir6384        | -1,51 | 2,78E-02 |
| TC1500000783.mm.1    | Mir6392        | -1,37 | 1,18E-03 |
| TC1100000870.mm.1    | Mir6406        | 1,57  | 4,72E-02 |
| TC0500000874.mm.1    | Mir6415        | 1,97  | 1,96E-02 |
| TC1400002294.mm.1    | Mir6539        | -1,76 | 2,10E-02 |
| TC1000000849.mm.1    | Mir6911        | 1,65  | 2,40E-02 |
| TC1000000897.mm.1    | Mir6913        | -1,78 | 7,04E-03 |
| TC1100002870.mm.1    | Mir6921        | 1,67  | 7,02E-04 |
| TC1100001544.mm.1    | Mir6927        | -1,35 | 3,07E-02 |
| TC1200000237.mm.1    | Mir6937        | 1,57  | 1,08E-03 |
| TC1200002444.mm.1    | Mir6941        | -1,42 | 2,04E-03 |
| TC1400002064.mm.1    | Mir6948        | 1,71  | 2,12E-02 |
| TC1400002114.mm.1    | Mir6949        | 1,53  | 6,66E-03 |
| TC1600002159.mm.1    | Mir6964        | 1,71  | 4,84E-02 |
| TC1700000674.mm.1    | Mir6973a       | 1,32  | 1,38E-02 |
| TC1800001223.mm.1    | Mir6980        | 1,85  | 5,73E-04 |
| TC1800000626.mm.1    | Mir6983        | -2,10 | 7,67E-03 |
| TC0200004139.mm.1    | Mir7000        | 1,36  | 1,50E-02 |
| TC0700002618.mm.1    | Mir7047        | 1,39  | 2,71E-02 |
| TC0700004590.mm.1    | Mir7064        | -1,39 | 1,50E-02 |
| TC0800002464.mm.1    | Mir7068        | 1,34  | 5,97E-03 |
| TC0800000967.mm.1    | Mir7069        | 1,58  | 9,42E-04 |
| TC0800002873.mm.1    | Mir7075        | 1,60  | 3,41E-03 |
| TC0800002952.mm.1    | Mir7076        | 2,00  | 2,58E-04 |
| TC0800001406.mm.1    | Mir7078        | -2,84 | 1,10E-02 |
| TC0900001852.mm.1    | Mir7081        | 1,67  | 1,49E-02 |
| TC0400001466.mm.1    | Mir7119        | 1,64  | 3,11E-03 |
| TC0X00002218.mm.1    | Mir717         | 1,79  | 2,68E-02 |
| TC1500000168.mm.1    | Mir7212        | 1,42  | 1,55E-03 |
| TC0200001439.mm.1    | Mir7221        | -1,90 | 6,39E-03 |
| TC0500003235.mm.1    | Mir7647        | 1,58  | 1,47E-02 |
| TSUnmapped00000109.n | Mir7660        | 1,56  | 3,68E-03 |
| TC1000001865.mm.1    | Mir7663        | -1,46 | 1,22E-02 |
| TC0900001862.mm.1    | Mir7667        | 2,48  | 3,84E-02 |
| TSUnmapped00000114.n | Mir7689        | -1,41 | 3,07E-03 |
| TC0100003301.mm.1    | MR1            | 1,32  | 2,64E-03 |
| TCOM000000006.mm.1   | MT-CO1         | 1,32  | 1,95E-03 |
| TCOM000000005.mm.1   | MT-ND2         | 2,38  | 8,60E-03 |
| TCOM000000011.mm.1   | MT-ND3         | 1,51  | 9,39E-03 |
| TC0X00001524.mm.1    | n-R5s13        | 1,58  | 3,81E-02 |
| TC0600000722.mm.1    | n-R5s162       | 3,74  | 5,25E-05 |
| TC0300000011.mm.1    | n-R5s194       | 1,86  | 2,15E-03 |
| TC0100000354.mm.1    | n-R5s211       | 1,90  | 6,21E-03 |
| TC1600000459.mm.1    | n-R5s33        | 2,13  | 5,86E-04 |
| TC1200002099.mm.1    | n-R5s64        | 2,00  | 3,72E-04 |
| TC0100002319.mm.1    | NAB1           | 1,31  | 1,65E-02 |
| TC0600003600.mm.1    | Nat8f5         | -1,33 | 3,94E-02 |
| TC1700001015.mm.1    | NDUFA11        | 1,50  | 1,88E-02 |
| TC1000001566.mm.1    | NDUFA4L2       | 1,99  | 3,16E-02 |
| TC0700002124.mm.1    | NLRP12         | 1,31  | 3,77E-02 |
| TC1300002740.mm.1    | Nnt            | 1,30  | 4,76E-03 |
| TC1100003688.mm.1    | NR1D1          | -3,13 | 2,34E-02 |
| TC1000002657.mm.1    | NR1H4          | 1,67  | 2,51E-02 |
| TC0900002332.mm.1    | NRG4           | 2,99  | 6,88E-03 |
| TC0900002988.mm.1    | NUDT16         | 1,32  | 2,26E-02 |
| TC0800001097.mm.1    | NUP93          | -1,33 | 2,91E-02 |
| TC0700004409.mm.1    | OAT            | -3,41 | 4,22E-02 |
| TC0200004019.mm.1    | Olfr1180       | 1,40  | 1,23E-02 |
| TC0200004054.mm.1    | Olfr1233       | 1,37  | 2,40E-02 |
| TC1900000262.mm.1    | Olfr1451       | -1,57 | 4,09E-02 |
| TC0900000156.mm.1    | Olfr58 (includ | -1,31 | 1,11E-02 |
| TC0700004015.mm.1    | Olfr695        | 1,38  | 2,27E-02 |
| TC1000003181.mm.1    | Olfr777/Olfr8  | 1,53  | 2,79E-02 |
| TC0700001572.mm.1    | OR2D3          | 1,47  | 4,76E-02 |
| TC0200004077.mm.1    | OR4C3          | -1,55 | 4,03E-02 |
| TC0600000415.mm.1    | OR9A4          | -1,38 | 5,51E-03 |

|                      |              |       |          |
|----------------------|--------------|-------|----------|
| TC0400001390.mm.1    | Oxct2a/Oxct2 | -1,67 | 1,04E-02 |
| TC0600003317.mm.1    | Pbp2         | 1,59  | 1,55E-02 |
| TC1900000040.mm.1    | PC           | -1,72 | 9,88E-03 |
| TC0200002683.mm.1    | PCK1         | -2,61 | 1,49E-02 |
| TC1400001436.mm.1    | PDHB         | -1,91 | 6,46E-03 |
| TC1100003107.mm.1    | PFN1         | 1,76  | 2,48E-02 |
| TC1200002089.mm.1    | PGF          | -1,48 | 3,50E-02 |
| TC1700002101.mm.1    | PGK2         | 1,89  | 2,41E-03 |
| TC1100000001.mm.1    | Pisd-ps1     | -1,61 | 3,57E-03 |
| TC1700001348.mm.1    | Pisd-ps2     | -1,43 | 3,66E-03 |
| TC0600003329.mm.1    | PLBD1        | -1,33 | 2,48E-02 |
| TC1100003934.mm.1    | POLG2        | -1,30 | 1,96E-02 |
| TC0200005386.mm.1    | PPP1R3D      | -1,39 | 1,83E-02 |
| TC0500000809.mm.1    | Prol1        | 2,10  | 2,73E-03 |
| TC0700004346.mm.1    | PRSS8        | 1,41  | 3,75E-02 |
| TC1900001203.mm.1    | PSAT1        | -1,40 | 2,63E-02 |
| TC1100004291.mm.1    | Psme2b       | 1,47  | 1,01E-03 |
| TC0900001410.mm.1    | Qars         | -1,61 | 2,29E-02 |
| TC0600002978.mm.1    | RASSF4       | 1,92  | 9,67E-03 |
| TC1000003221.mm.1    | RDH16        | -1,70 | 4,49E-02 |
| TC0600001741.mm.1    | REP15        | -1,79 | 5,26E-03 |
| TC0X00000359.mm.1    | Rhox10       | 1,36  | 2,44E-02 |
| TC0600002206.mm.1    | Rn4.5s       | 1,81  | 1,58E-02 |
| TC0700004658.mm.1    | RNF141       | -1,33 | 2,00E-02 |
| TSUnmapped00000181.n | RNY1         | 2,82  | 4,01E-02 |
| TSUnmapped00000180.n | Rny3         | 2,05  | 1,86E-03 |
| TC1200001841.mm.1    | RPL10L       | 1,31  | 4,47E-02 |
| TC0100002198.mm.1    | Rpl12-ps1    | 1,52  | 7,84E-03 |
| TC1100002300.mm.1    | Rpl12-ps2    | 1,70  | 1,32E-03 |
| TC0200000708.mm.1    | Rpl15-ps4    | 1,47  | 8,49E-03 |
| TC0100000486.mm.1    | Rpl18-ps1    | 1,66  | 4,55E-02 |
| TC1200001765.mm.1    | Rpl18a-ps1   | 1,73  | 1,24E-02 |
| TC1100000971.mm.1    | Rpl23a-ps2   | 1,32  | 3,01E-02 |
| TC0200002038.mm.1    | Rpl23a-ps4   | 1,37  | 2,45E-02 |
| TC0400003526.mm.1    | Rpl28-ps3    | 1,70  | 4,09E-02 |
| TC0X00000701.mm.1    | Rpl3-ps2     | 1,42  | 3,18E-02 |
| TC0200005315.mm.1    | Rpl30-ps5    | 1,30  | 4,90E-02 |
| TC0300000292.mm.1    | Rpl31-ps15   | 1,56  | 3,94E-02 |
| TC1900000742.mm.1    | Rpl31-ps18   | 1,49  | 2,57E-02 |
| TC1500000779.mm.1    | Rpl31-ps22   | 1,55  | 4,56E-02 |
| TC0800002043.mm.1    | Rpl31-ps23   | 1,56  | 1,68E-03 |
| TC0100000543.mm.1    | Rpl31-ps24   | 1,42  | 3,82E-02 |
| TC1700002614.mm.1    | Rpl31-ps25   | 1,42  | 2,90E-02 |
| TC0500000166.mm.1    | Rpl31-ps5    | 1,57  | 2,43E-02 |
| TC0500001420.mm.1    | Rpl31-ps6    | 1,37  | 2,26E-02 |
| TC0600002210.mm.1    | Rpl31-ps7    | 1,44  | 3,81E-02 |
| TC0X00002057.mm.1    | RPL39        | 1,41  | 2,56E-02 |
| TC1500001107.mm.1    | Rpl39-ps     | 1,62  | 1,60E-02 |
| TC0X00000606.mm.1    | Rpl7a-ps13   | 1,41  | 1,54E-02 |
| TC1100003400.mm.1    | Rpl9-ps1     | 1,46  | 3,03E-03 |
| TC1100000607.mm.1    | Rpl9-ps3     | 1,31  | 3,66E-02 |
| TC1700002025.mm.1    | Rpl9-ps9     | 1,36  | 1,74E-02 |
| TC0300000845.mm.1    | Rplp0-ps1    | 1,45  | 2,69E-02 |
| TC0800001620.mm.1    | Rprl3        | -1,53 | 4,52E-02 |
| TC1100001719.mm.1    | RPRML        | -1,34 | 1,45E-02 |
| TC0500003620.mm.1    | Rps10-ps4    | 1,45  | 1,27E-02 |
| TC0900002411.mm.1    | Rps11-ps1    | 1,53  | 2,29E-02 |
| TC0X00001511.mm.1    | Rps12-ps7    | 1,33  | 1,23E-02 |
| TC0500002904.mm.1    | Rps15a-ps5   | 1,75  | 6,09E-03 |
| TC0500002939.mm.1    | Rps19-ps8    | 1,40  | 2,79E-03 |
| TC0600002670.mm.1    | Rps19-ps9    | 1,35  | 2,82E-02 |
| TC1100000610.mm.1    | Rps2-ps4     | 1,49  | 1,65E-02 |
| TC1300001017.mm.1    | RPS23        | 1,38  | 3,18E-02 |
| TC0800001611.mm.1    | Rps23-ps2    | 1,54  | 2,93E-02 |
| TC0100000516.mm.1    | Rps27-ps1    | 1,46  | 4,17E-02 |
| TC0400002749.mm.1    | Rpsa-ps11    | 1,65  | 3,83E-03 |
| TC1100000285.mm.1    | Rpsa-ps5     | 1,40  | 1,51E-03 |

|                      |                |       |          |
|----------------------|----------------|-------|----------|
| TC0700000826.mm.1    | RRAS           | 2,41  | 3,02E-02 |
| TC0300000809.mm.1    | S100A6         | 1,54  | 7,58E-03 |
| TC0300000811.mm.1    | S100A8         | 1,36  | 1,15E-02 |
| TC0700003039.mm.1    | Saa3           | -1,81 | 2,78E-02 |
| TSUnmapped00000007.n | SAMD15         | 1,32  | 3,94E-03 |
| TC0600003137.mm.1    | Scarna10       | -1,85 | 4,19E-02 |
| TC0700002025.mm.1    | Scgb1c1        | -1,37 | 3,89E-02 |
| TC0100003528.mm.1    | SDHC           | 1,61  | 1,10E-02 |
| TC0900002271.mm.1    | SDHD           | 1,50  | 9,73E-03 |
| TC1500000002.mm.1    | SELENOP        | 1,43  | 4,78E-02 |
| TC1200001044.mm.1    | SERPINA3       | 1,54  | 3,96E-02 |
| TC1200002290.mm.1    | Serpina3d-ps   | 1,49  | 1,60E-02 |
| TC1200002291.mm.1    | Serpina3e-ps   | 1,61  | 5,92E-03 |
| TC1200002526.mm.1    | Serpina3h      | 1,31  | 3,35E-03 |
| TC1100004285.mm.1    | SFI1           | -1,74 | 3,94E-02 |
| TC0200001524.mm.1    | SLC1A2         | -1,87 | 6,42E-04 |
| TC1700001450.mm.1    | SLC22A1        | -2,14 | 3,34E-02 |
| TC1100003836.mm.1    | SLC25A39       | 1,36  | 4,11E-02 |
| TC0100002288.mm.1    | SLC39A10       | -1,30 | 8,39E-03 |
| TC1600001019.mm.1    | SLC5A3         | -1,34 | 1,92E-02 |
| TC0800000482.mm.1    | SLC7A2         | 2,47  | 3,09E-03 |
| TC0900001297.mm.1    | SLCO2A1        | 2,00  | 4,66E-02 |
| TC0500003714.mm.1    | Smok2b (inclu  | -1,81 | 3,80E-02 |
| TC0100000521.mm.1    | Snora41        | -2,22 | 1,39E-02 |
| TC1100003289.mm.1    | Snord42a       | 2,56  | 2,91E-02 |
| TC0500001025.mm.1    | SPP1           | 1,60  | 3,25E-02 |
| TC0Y00000240.mm.1    | Sry            | 1,42  | 1,98E-02 |
| TC0X00000122.mm.1    | SYTL5          | 2,03  | 4,72E-02 |
| TC1000000203.mm.1    | Taar7b (inclu  | -1,56 | 4,94E-02 |
| TC0600002427.mm.1    | TACSTD2        | 1,36  | 2,87E-02 |
| TC1100001756.mm.1    | TANC2          | -1,34 | 3,08E-02 |
| TC0600000463.mm.1    | TAS2R41        | -1,30 | 4,56E-02 |
| TC1200001054.mm.1    | Tcl1b4 (includ | -1,58 | 3,10E-02 |
| TC0900002119.mm.1    | TECTA          | -1,32 | 6,36E-03 |
| TC1600000440.mm.1    | TM4SF19        | -1,42 | 3,09E-02 |
| TC1600002152.mm.1    | TMPRSS2        | 1,62  | 4,06E-02 |
| TC1400000726.mm.1    | Traj57         | 1,49  | 2,80E-02 |
| TC1400002826.mm.1    | Trav4-4-dv10   | -1,46 | 2,23E-02 |
| TC1400002804.mm.1    | Trav6d-7       | -1,80 | 2,06E-02 |
| TC1400002801.mm.1    | Trav9d-4       | -1,41 | 1,94E-02 |
| TC0200004896.mm.1    | TRIB3          | -1,31 | 3,15E-02 |
| TC1000001068.mm.1    | Tyms-ps        | -1,38 | 5,51E-03 |
| TC1000003216.mm.1    | UBE2G2         | -1,40 | 4,23E-02 |
| TC0100000682.mm.1    | UTP14C         | -1,39 | 4,38E-02 |
| TC1900000415.mm.1    | VLDLR          | -2,01 | 1,50E-02 |
| TC0600000694.mm.1    | Vmn1r19        | 1,43  | 1,79E-03 |
| TC1300000231.mm.1    | Vmn1r192 (ir   | -1,77 | 2,27E-03 |
| TC0700003665.mm.1    | Vmn2r-ps65     | 1,33  | 1,59E-02 |
| TC1700001536.mm.1    | Vmn2r106       | 1,31  | 3,26E-02 |
| TC1000001675.mm.1    | ZBTB2          | -1,37 | 5,16E-03 |
| TC1300002228.mm.1    | Zfp640         | -2,05 | 3,69E-02 |
| TC1100003597.mm.1    | Zfp652os       | 1,50  | 9,74E-04 |
| TC0200005514.mm.1    | ZHX3           | 1,35  | 7,26E-03 |
| TC0700000368.mm.1    | ZNF180         | -1,33 | 1,32E-03 |
| TC0400003995.mm.1    | ZNF616         | -1,42 | 2,19E-02 |

[illegible]

| Transcription Factor | ontologies: Molecular Term | Prevalent Activation Sites | Activation score | Number of genes | Target molecules in dataset |
|----------------------|----------------------------|----------------------------|------------------|-----------------|-----------------------------|
| ADAMTS-1             | transcription regulator    | chromatin                  | 0.00             | 1,501/19        | no 1501/19                  |
| ADAMTS-1             | chromatin                  | chromatin                  | 0.04             | 1,511/19        | no 1501/19                  |
| ADAMTS-1             | chromatin                  | chromatin                  | 0.19             | 1,519/19        | no 1501/19                  |
| ADAMTS-1             | chromatin                  | chromatin                  | 0.49             | 1,530/19        | no 1501/19                  |
| ADAMTS-1             | chromatin                  | chromatin                  | 0.59             | 1,539/19        | no 1501/19                  |
| ADAMTS-1             | chromatin                  | chromatin                  | 0.69             | 1,548/19        | no 1501/19                  |
| ADAMTS-1             | chromatin                  | chromatin                  | 0.79             | 1,557/19        | no 1501/19                  |
| ADAMTS-1             | chromatin                  | chromatin                  | 0.89             | 1,566/19        | no 1501/19                  |
| ADAMTS-1             | chromatin                  | chromatin                  | 0.99             | 1,575/19        | no 1501/19                  |
| ADAMTS-1             | chromatin                  | chromatin                  | 1.00             | 1,584/19        | no 1501/19                  |
| ADAMTS-1             | chromatin                  | chromatin                  | 1.01             | 1,593/19        | no 1501/19                  |
| ADAMTS-1             | chromatin                  | chromatin                  | 1.02             | 1,602/19        | no 1501/19                  |
| ADAMTS-1             | chromatin                  | chromatin                  | 1.03             | 1,611/19        | no 1501/19                  |
| ADAMTS-1             | chromatin                  | chromatin                  | 1.04             | 1,620/19        | no 1501/19                  |
| ADAMTS-1             | chromatin                  | chromatin                  | 1.05             | 1,629/19        | no 1501/19                  |
| ADAMTS-1             | chromatin                  | chromatin                  | 1.06             | 1,638/19        | no 1501/19                  |
| ADAMTS-1             | chromatin                  | chromatin                  | 1.07             | 1,647/19        | no 1501/19                  |
| ADAMTS-1             | chromatin                  | chromatin                  | 1.08             | 1,656/19        | no 1501/19                  |
| ADAMTS-1             | chromatin                  | chromatin                  | 1.09             | 1,665/19        | no 1501/19                  |
| ADAMTS-1             | chromatin                  | chromatin                  | 1.10             | 1,674/19        | no 1501/19                  |
| ADAMTS-1             | chromatin                  | chromatin                  | 1.11             | 1,683/19        | no 1501/19                  |
| ADAMTS-1             | chromatin                  | chromatin                  | 1.12             | 1,692/19        | no 1501/19                  |
| ADAMTS-1             | chromatin                  | chromatin                  | 1.13             | 1,701/19        | no 1501/19                  |
| ADAMTS-1             | chromatin                  | chromatin                  | 1.14             | 1,710/19        | no 1501/19                  |
| ADAMTS-1             | chromatin                  | chromatin                  | 1.15             | 1,719/19        | no 1501/19                  |
| ADAMTS-1             | chromatin                  | chromatin                  | 1.16             | 1,728/19        | no 1501/19                  |
| ADAMTS-1             | chromatin                  | chromatin                  | 1.17             | 1,737/19        | no 1501/19                  |
| ADAMTS-1             | chromatin                  | chromatin                  | 1.18             | 1,746/19        | no 1501/19                  |
| ADAMTS-1             | chromatin                  | chromatin                  | 1.19             | 1,755/19        | no 1501/19                  |
| ADAMTS-1             | chromatin                  | chromatin                  | 1.20             | 1,764/19        | no 1501/19                  |
| ADAMTS-1             | chromatin                  | chromatin                  | 1.21             | 1,773/19        | no 1501/19                  |
| ADAMTS-1             | chromatin                  | chromatin                  | 1.22             | 1,782/19        | no 1501/19                  |
| ADAMTS-1             | chromatin                  | chromatin                  | 1.23             | 1,791/19        | no 1501/19                  |
| ADAMTS-1             | chromatin                  | chromatin                  | 1.24             | 1,800/19        | no 1501/19                  |
| ADAMTS-1             | chromatin                  | chromatin                  | 1.25             | 1,809/19        | no 1501/19                  |
| ADAMTS-1             | chromatin                  | chromatin                  | 1.26             | 1,818/19        | no 1501/19                  |
| ADAMTS-1             | chromatin                  | chromatin                  | 1.27             | 1,827/19        | no 1501/19                  |
| ADAMTS-1             | chromatin                  | chromatin                  | 1.28             | 1,836/19        | no 1501/19                  |
| ADAMTS-1             | chromatin                  | chromatin                  | 1.29             | 1,845/19        | no 1501/19                  |
| ADAMTS-1             | chromatin                  | chromatin                  | 1.30             | 1,854/19        | no 1501/19                  |
| ADAMTS-1             | chromatin                  | chromatin                  | 1.31             | 1,863/19        | no 1501/19                  |
| ADAMTS-1             | chromatin                  | chromatin                  | 1.32             | 1,872/19        | no 1501/19                  |
| ADAMTS-1             | chromatin                  | chromatin                  | 1.33             | 1,881/19        | no 1501/19                  |
| ADAMTS-1             | chromatin                  | chromatin                  | 1.34             | 1,890/19        | no 1501/19                  |
| ADAMTS-1             | chromatin                  | chromatin                  | 1.35             | 1,899/19        | no 1501/19                  |
| ADAMTS-1             | chromatin                  | chromatin                  | 1.36             | 1,908/19        | no 1501/19                  |
| ADAMTS-1             | chromatin                  | chromatin                  | 1.37             | 1,917/19        | no 1501/19                  |
| ADAMTS-1             | chromatin                  | chromatin                  | 1.38             | 1,926/19        | no 1501/19                  |
| ADAMTS-1             | chromatin                  | chromatin                  | 1.39             | 1,935/19        | no 1501/19                  |
| ADAMTS-1             | chromatin                  | chromatin                  | 1.40             | 1,944/19        | no 1501/19                  |
| ADAMTS-1             | chromatin                  | chromatin                  | 1.41             | 1,953/19        | no 1501/19                  |
| ADAMTS-1             | chromatin                  | chromatin                  | 1.42             | 1,962/19        | no 1501/19                  |
| ADAMTS-1             | chromatin                  | chromatin                  | 1.43             | 1,971/19        | no 1501/19                  |
| ADAMTS-1             | chromatin                  | chromatin                  | 1.44             | 1,980/19        | no 1501/19                  |
| ADAMTS-1             | chromatin                  | chromatin                  | 1.45             | 1,989/19        | no 1501/19                  |
| ADAMTS-1             | chromatin                  | chromatin                  | 1.46             | 1,998/19        | no 1501/19                  |
| ADAMTS-1             | chromatin                  | chromatin                  | 1.47             | 2,007/19        | no 1501/19                  |
| ADAMTS-1             | chromatin                  | chromatin                  | 1.48             | 2,016/19        | no 1501/19                  |
| ADAMTS-1             | chromatin                  | chromatin                  | 1.49             | 2,025/19        | no 1501/19                  |
| ADAMTS-1             | chromatin                  | chromatin                  | 1.50             | 2,034/19        | no 1501/19                  |
| ADAMTS-1             | chromatin                  | chromatin                  | 1.51             | 2,043/19        | no 1501/19</                |

## Analyses set A: hepatocyte derived transcripts

| Ingenuity Canonical Pathways                           | -log(p-value) | zScore     | Ratio | Molecules                                                                    |
|--------------------------------------------------------|---------------|------------|-------|------------------------------------------------------------------------------|
| Arginine Degradation I (Arginase Pathway)              | 1,51          |            |       | 0,25 OAT                                                                     |
| Sirtuin Signaling Pathway                              | 4,73          | -1,4142136 |       | 0,0377 ATG101,CPS1,CPT1A,MT-ND2,MT-ND3,NDUFA11,NDUFA4L2,NR1H4,PCK1,SDHC,SDHD |
| Ketolysis                                              | 4,28          |            |       | 0,3 ACAA2,ACAT2,Oxct2a/Oxct2b                                                |
| Mitochondrial Dysfunction                              | 4,23          |            |       | 0,0468 CPT1A,MT-CO1,MT-ND2,MT-ND3,NDUFA11,NDUFA4L2,SDHC,SDHD                 |
| Oxidative Phosphorylation                              | 3,63          | 2,4494897  |       | 0,0541 MT-CO1,MT-ND2,MT-ND3,NDUFA11,SDHC,SDHD                                |
| Cancer Drug Resistance By Drug Efflux                  | 2,97          |            |       | 0,069 mir-154,mir-181,mir-379,RRAS                                           |
| Histidine Degradation VI                               | 2,88          |            |       | 0,107 Cyp2d26,CYP7B1,HAL                                                     |
| LXR/RXR Activation                                     | 2,56          | 0          |       | 0,0407 ACACA,APOB,CYP7A1,NR1H4,S100A8                                        |
| FXR/RXR Activation                                     | 2,52          |            |       | 0,0397 APOB,CYP7A1,G6PC1,NR1H4,VLDLR                                         |
| Ketogenesis                                            | 2,5           |            |       | 0,182 ACAA2,ACAT2                                                            |
| TR/RXR Activation                                      | 2,38          |            |       | 0,0476 ACACA,CYP7A1,G6PC1,PCK1                                               |
| Estrogen Receptor Signaling                            | 2,34          | 0,4472136  |       | 0,0222 MED30,MT-ND2,MT-ND3,NDUFA11,NDUFA4L2,PGF,RRAS,SDHC,SDHD               |
| Mevalonate Pathway I                                   | 2,29          |            |       | 0,143 ACAA2,ACAT2                                                            |
| Role of IL-17A in Psoriasis                            | 2,29          |            |       | 0,143 IL17RC,S100A8                                                          |
| Superpathway of Citrulline Metabolism                  | 2,23          |            |       | 0,133 CPS1,OAT                                                               |
| Glucocorticoid Receptor Signaling                      | 2,23          |            |       | 0,0189 G6PC1,IL17RC,MT-ND2,MT-ND3,NDUFA11,NDUFA4L2,PC,PCK1,RRAS,SDHC,SDHD    |
| Isoleucine Degradation I                               | 2,07          |            |       | 0,111 ACAA2,ACAT2                                                            |
| Superpathway of Geranylgeranyldiphosphate Biosynthesis | 2,07          |            |       | 0,111 ACAA2,ACAT2                                                            |
| HOTAIR Regulatory Pathway                              | 2,05          | 1,3416408  |       | 0,0307 let-7,mir-29,mir-7,mir-8,SPP1                                         |
| Glutaryl-CoA Degradation                               | 1,94          |            |       | 0,0952 ACAA2,ACAT2                                                           |
| TCA Cycle II (Eukaryotic)                              | 1,87          |            |       | 0,087 SDHC,SDHD                                                              |
| PXR/RXR Activation                                     | 1,85          |            |       | 0,0462 CPT1A,CYP7A1,G6PC1                                                    |
| LPS/IL-1 Mediated Inhibition of RXR Function           | 1,84          |            |       | 0,0236 CPT1A,Cyp2d26,CYP7A1,FMO5,GSTA5,NR1H4                                 |
| Neuroprotective Role of THOP1 in Alzheimer's Disease   | 1,84          | 1          |       | 0,0333 GNRH1,PRSS8,SERPINA3,TMPRSS2                                          |
| Pregnenolone Biosynthesis                              | 1,73          |            |       | 0,0741 Cyp2d26,CYP7B1                                                        |
| Tryptophan Degradation III (Eukaryotic)                | 1,7           |            |       | 0,0714 ACAA2,ACAT2                                                           |
| Superpathway of Cholesterol Biosynthesis               | 1,67          |            |       | 0,069 ACAA2,ACAT2                                                            |
| Ubiquinol-10 Biosynthesis (Eukaryotic)                 | 1,65          |            |       | 0,0667 Cyp2d26,CYP7B1                                                        |
| Biotin-carboxyl Carrier Protein Assembly               | 1,64          |            |       | 0,333 ACACA                                                                  |
| Thyroid Cancer Signaling                               | 1,63          |            |       | 0,038 CXCR4,IRS2,RRAS                                                        |
| Insulin Receptor Signaling                             | 1,62          | 0          |       | 0,0286 GYS2,IRS2,PPP1R3D,RRAS                                                |
| Chemokine Signaling                                    | 1,61          |            |       | 0,0375 CAMK2B,CXCR4,RRAS                                                     |

## Analyses set B: hepatocyte derived miRNAs

| Ingenuity Canonical Pathways          | -log(p-value) | zScore | Ratio | Molecules                       |
|---------------------------------------|---------------|--------|-------|---------------------------------|
| HOTAIR Regulatory Pathway             | 4,69          | 1      |       | 0,0245 let-7,mir-29,mir-7,mir-8 |
| Cancer Drug Resistance By Drug Efflux | 4,57          |        |       | 0,0517 mir-154,mir-181,mir-379  |
